# Supplementary material
Source: PubMed Central journal article supplement (PMC2245852)
Supplement: plntphys_pp.107.113076_1.pdf [file plntphys_pp.107.113076_1.pdf]

### Mitochondrial pyruvate dehydrogenase complex E1 $\alpha$

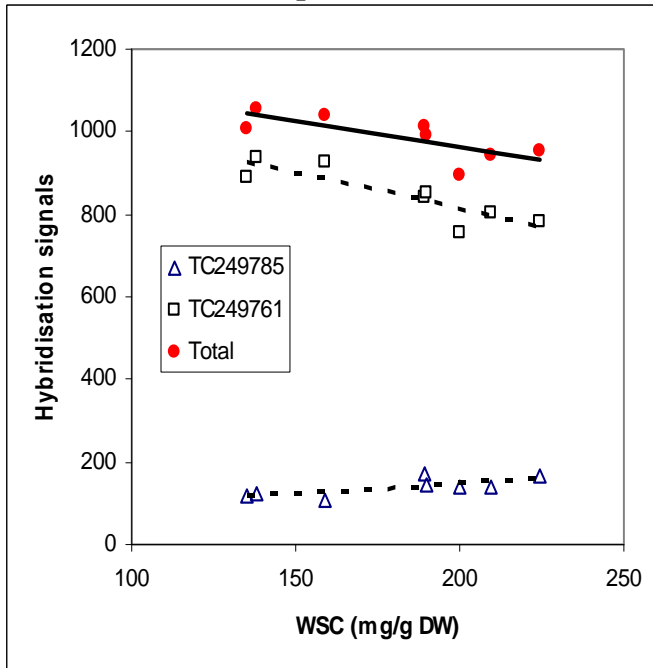

### Cytoplasmic NAD-dependent GAP dehydrogenase

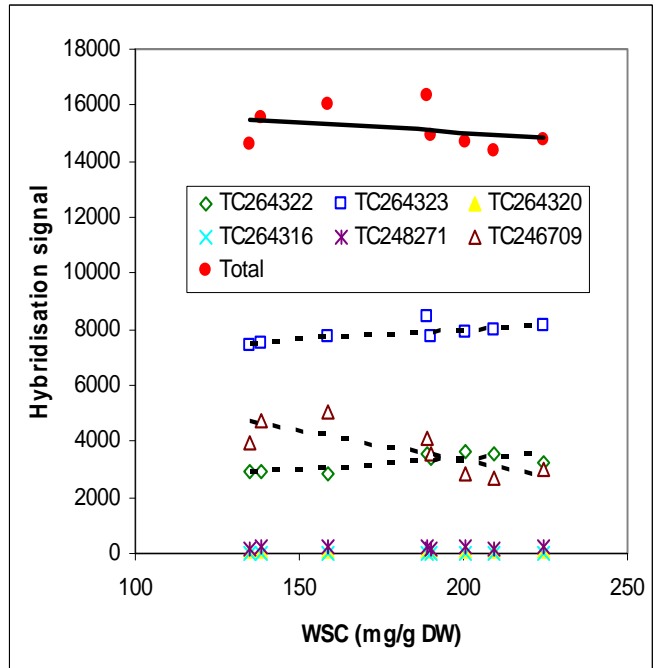

### Diphosphate--fructose 6-phosphate 1-phosphotransferase alpha subunit

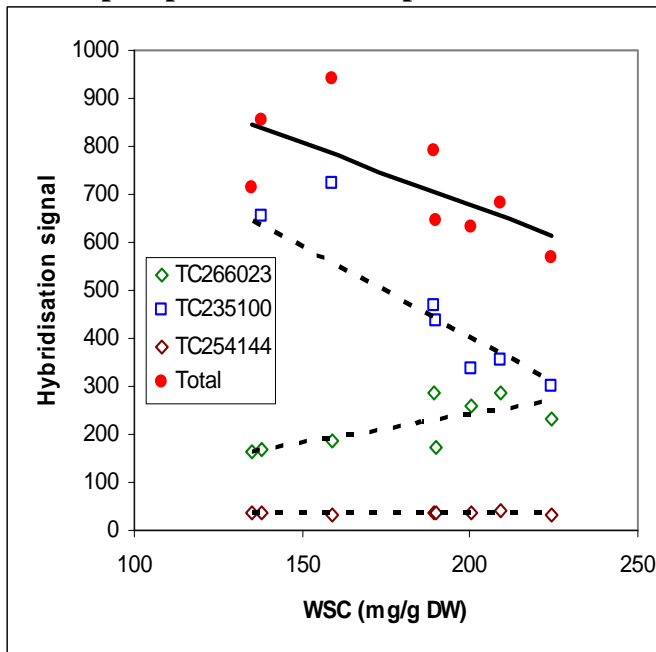

### Cytoplasmic glucose-6-phosphate dehydrogenase

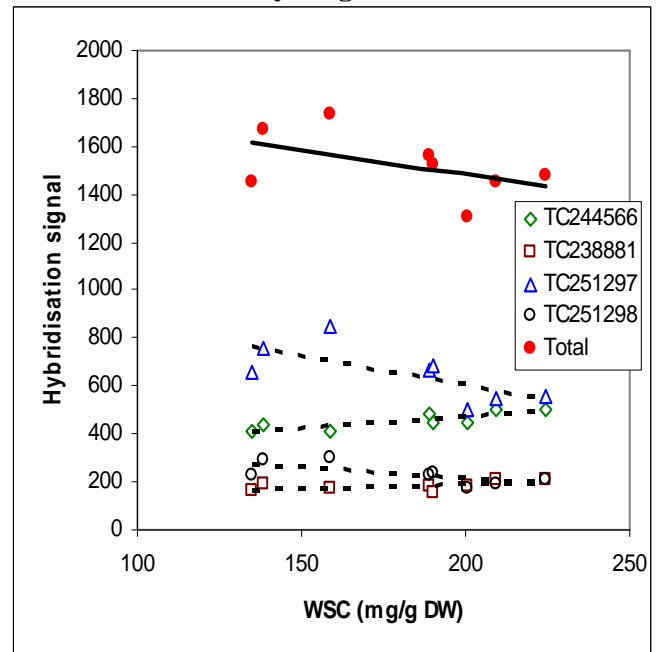

**Supplementary Figure S1.** Illustration of differential regulation of isoenzyme genes within an enzyme gene family between high and low WSC lines. The mRNA levels of genes were measured using Affymetrix GeneChip analysis. Each point is the mean of mRNA levels from two field replicate samples.
